# Supplementary material
Source: ML conference proceedings conference paper supplement (https://proceedings.mlr.press/v80/chen18j.html)
Supplement: Supplementary file 1 [file chen18j-supp.pdf]

# Supplementary Materials for Learning to Explain: An Information-Theoretic Perspective on Model Interpretation

## 1 Proof of Theorem 1

**Forward direction:** Any explanation is represented as a conditional distribution of the feature subset over the input vector. Given the definition of  $S^*$ , we have for any  $X$ , and any explanation  $\mathcal{E} : S|X$ ,

$$\mathbb{E}_{S|X} \mathbb{E}_m[\log P_m(Y|X_S)|X] \leq \mathbb{E}_m[\log P_m(Y|X_{S^*(X)})|X]. \quad (1)$$

In the case when  $S^*(X)$  is a set instead of a singleton, we identify  $S^*(X)$  with any distribution that assigns arbitrary probability to each elements in  $S^*(X)$  with zero probability outside  $S^*(X)$ . With abuse of notation,  $S^*$  indicates both the set function that maps every  $X$  to a set  $S^*(X)$  and any real-valued function that maps  $X$  to an element in  $S^*(X)$ .

Taking expectation over the distribution of  $X$ , and adding  $\mathbb{E} \log P_m(Y)$  at both sides, we have

$$I(X_S; Y) \leq I(X_{S^*}; Y) \quad (2)$$

for any explanation  $\mathcal{E} : S|X$ .

**Reverse direction:** The reverse direction is proved by contradiction. Assume the optimal explanation  $P(S|X)$  is such that there exists a set  $M$  of nonzero probability, over which  $P(S|X)$  does not degenerates to an element in  $S^*(X)$ . Concretely, we define  $M$  as

$$M = \{x : P(S \notin S^*(x)|X = x) > 0\}. \quad (3)$$

For any  $x \in M$ , we have

$$\mathbb{E}_{S|X} \mathbb{E}_m[\log P_m(Y|X_S)|X = x] < \mathbb{E}_m[\log P_m(Y|X_{S^*(x)})|X = x], \quad (4)$$

where  $S^*(x)$  is a deterministic function in the set of distributions that assign arbitrary probability to each elements in  $S^*(x)$  with zero probability outside  $S^*(x)$ . Outside  $M$ , we always have

$$\mathbb{E}_{S|X} \mathbb{E}_m[\log P_m(Y|X_S)|X = x] \leq \mathbb{E}_m[\log P_m(Y|X_{S^*(x)})|X = x] \quad (5)$$

from the definition of  $S^*$ . As  $M$  is of nonzero size over  $P(X)$ , combining Equation 4 and Equation 5 and taking expectation with respect to  $P(X)$ , we have

$$I(X_S; Y) < I(X_{S^*}; Y), \quad (6)$$

which is a contradiction.

## 2 Examples of selected sentences by L2X

Table 1 contains example reviews where the key sentence selected by our algorithm is highlighted in yellow.

Table 1: Key sentences picked by L2X for ten randomly selected samples. The true labels and the labels from the model are also shown in the first two columns. (below)

| Truth    | Predicted | Key sentence                                                                                                                                                                                                                                                                                                                                                                                                                                                                            |
|----------|-----------|-----------------------------------------------------------------------------------------------------------------------------------------------------------------------------------------------------------------------------------------------------------------------------------------------------------------------------------------------------------------------------------------------------------------------------------------------------------------------------------------|
| negative | negative  | I was very skeptical about sacrificing my precious time to watch this film. I didnt enjoy the first one at all, and the last jean claude van damme film i liked was blood sports! After managing to sit through it all? <b>Avoid, avoid, avoid!</b> !                                                                                                                                                                                                                                   |
| positive | positive  | I saw this film earlier today, and i was amazed at how accurate the dialog is for the main characters. <b>It didnt feel like a film - it felt more like a documentary (the part i liked best).</b> The leading ladies in this film seemed as real to me as any fifteen year-old girls i know.all in all, a very enjoyable film for those who enjoy independent films.                                                                                                                   |
| positive | positive  | <b>This film is more about how children make sense of the world around them, and how they (and we) use myth to make sense of it all.</b> I think its been misperceived, everyone going in expecting a stalkfest wont enjoy it but if you want a deeper story, its here.....                                                                                                                                                                                                             |
| positive | positive  | I want to add to the praise for the production of this film, especially the luminous cinematography. <b>Firelight glistening off of smooth and muscled skin creates stunningly beautiful imagery.</b> The film was nominated for (and won) a single oscar - the first given for editing. Malas performance is moody, penetrating and powerful.                                                                                                                                          |
| positive | positive  | A pure reality bytes film. <b>Fragile, beautiful and amazing first film of the director.</b> Represented spain on the berlinale 2002. some people has compared the grammar of the film with almodovars films...well, that shouldnt be a problem...                                                                                                                                                                                                                                      |
| negative | negative  | <b>Yet another forgettable warners foreign intrigue thriller, this is rendered even less enjoyable by the irritating presence of lauren bacall, who, without humphrey bogarts tender attentions to humanize her, comes off as her usual shrill, shallow self.</b> Even master gigolo charles boyer cannot feign romantic interest in her.                                                                                                                                               |
| negative | negative  | This dvd appears to be targetted at someone who will just put it on and play it in an endless loop in the background. Its organized as a series of music videos of the grand canyon set to various pieces of tangerine dream music.unfortunately, the td music is dull, and the transfer to dvd looks rather blurry and dim. <b>Too expensive a dvd for what it is.</b>                                                                                                                 |
| positive | positive  | Pakeezah is in my mind the greatest achievement of indian cinema. <b>The film is visually overwhelming but also emotionally breathtaking.</b> The music, the songs, the sets, the costumes, the cinematography, in fact every creative element is worthy of superlatives.                                                                                                                                                                                                               |
| positive | positive  | <b>Although the film is the adaptation of the french play (forgot the name - sorry), it is a wonderful portrayal of the cheerful side of georgian character.</b> This film will make you to burst into laughter and will fill your heart with warm sadness. It will display the overwhelming love of life along with human eccentricities.                                                                                                                                              |
| negative | negative  | I can say nothing more about this movie than: man, this sucks!!!! If you really hate yourself and want to do some severe damage to your brain, watch this movie. Its the best cure in the world for taking away happiness. When i started watching this film, i was completely happy. Afterwords i could feel my brain melting, like it was struck by molten lava. <b>God, i hate that stupid dinosaur.</b> So if you want severe brain damage: watch this movie, it will do the trick. |
| positive | positive  | <b>This is without a doubt the funniest comedy of the year.</b> Everybody is brilliant. The acting is superb. You can see that the actors enjoyed making this film. Its a shame to spoil the film with give aways, so rent it and laugh your ass off.9 - 10.                                                                                                                                                                                                                            |

|          |          |                                                                                                                                                                                                                                                                                                                                                                                                                                                                                                  |
|----------|----------|--------------------------------------------------------------------------------------------------------------------------------------------------------------------------------------------------------------------------------------------------------------------------------------------------------------------------------------------------------------------------------------------------------------------------------------------------------------------------------------------------|
| negative | positive | I understand there was some conflict between leigh and the great maggie smith during the filming. <b>Understandable when you put one of the worlds greatest actresses of all time (smith, of course) with one whose performances seem to get worse with each subsequent film.</b>                                                                                                                                                                                                                |
| negative | negative | One of those, why was this made? Movies. <b>The romance is very hard to swallow.</b> It is one of those romances, that, suddenly, click - they are in love. The movie is filled with long pauses and uncomfortable moments - the drive-in restaurant being the most notable. Charles grodin does a credible job but for most of the movie its just him and louise lasser. Ask yourself, do you want to watch grodin with his neurosis and lasser with her neurosis together for a hour and half? |
| positive | positive | <b>This is the weepy that beaches never was.</b> As much as i wanted to love beaches, it always seemed too hurried for me to feel for it (its soundtrack is one of my favorite albums though). Stella, on the other hand, moves at a slower (and occasionally too slow) pace and though its somewhat manipulative in its tears-inducing tale about a self-sacrificial mother, it works because bette and the rest of the cast turn in great performances. 10/10                                  |
| positive | positive | The japanese run lola run, his is one offbeat movie which will put a smile on just about anyones face. Fans of run lola run, tampopo, go!, and slacker will probably like this one. <b>It does tend to follow a formula that is increasingly popular these days of separate, seemingly unrelated vignettes, all contributing the the overall story in unexpected ways.</b> Catch it if you see it, otherwise wait for the rental.                                                                |
| positive | positive | This is probably my favorite movie of all time. <b>It is perfection in its storytelling.</b> It will break your heart not because its over sentimental but because you will truly feel every emotion these characters go through. You feel for doggie because of the hopeless situation that existed for young girls in china at that time.                                                                                                                                                      |
| positive | negative | <b>I dont know why i like this movie so well, but i never get tired of watching it.</b>                                                                                                                                                                                                                                                                                                                                                                                                          |
| positive | positive | <b>As long as you go into this movie knowing that its terrible: bad acting, bad effects, bad story, bad... everything, then youll love it.</b> This is one of my favorite goof on movies; watch it as a comedy and have a dozen good laughs!                                                                                                                                                                                                                                                     |
| negative | negative | <b>This movie is just plain terrible!!!!</b> Slow acting, slow at getting to the point and wooden characters that just shouldnt have been on there. The best part was the showing of iron maiden singing in some video at a theater and thats it. The ending was worth watching and waiting up for but that was it!! The characters in this movie put me to sleep almost. Avoid it!! !                                                                                                           |
| positive | positive | Ive seen this about 2 or 3 times and havent regretted it. Homeward bound is not just a typical animal movie. <b>Its unique, fun and bursting with adventure.</b> The things that make it a fun movie are the animals (obvious)who are wonderfully trained. A very good effort.8.5/10!                                                                                                                                                                                                            |
| negative | negative | I only watched this film from beginning to end because i promised a friend i would. <b>It lacks even unintentional entertainment value that many bad films have.</b> It may be the worst film i have ever seen. Im surprised a distributor put their name on it.                                                                                                                                                                                                                                 |
| positive | positive | This is just as good as the original 101 if not better. Of course, cruella steals the show with her outrageous behaviour and outfits, and the movie was probably made because the public wanted to see more of cruella. We see a lot more of her this time round. I also like ioan gruffudd as kevin, the rather bumbling male lead. <b>To use paris as the climax of the movie was a clever idea.</b> The movie is well worth watching whatever your age, provided you like animals.            |

|          |          |                                                                                                                                                                                                                                                                                                                                                                                                                                                                                                                                                                                                                                                                                                                                                                                        |
|----------|----------|----------------------------------------------------------------------------------------------------------------------------------------------------------------------------------------------------------------------------------------------------------------------------------------------------------------------------------------------------------------------------------------------------------------------------------------------------------------------------------------------------------------------------------------------------------------------------------------------------------------------------------------------------------------------------------------------------------------------------------------------------------------------------------------|
| positive | positive | Magnificent and unforgettable, stunningly atmospheric, and brilliantly acted by all. i really cannot understand what sort of people are panning this masterpiece and giving the preponderance of votes as 8 (and nine ones! )this, along with grapes of wrath, is john fords greatest movie. I would say that long voyage home is next in line, though quite a way back.rating: 10. it deserves a 12.                                                                                                                                                                                                                                                                                                                                                                                  |
| negative | negative | Kirstie alley, looking a bit slimmer, but only a bit, is in this mess along with a man who is a macguyver lookalike, bleached blond hair and all. The premise of the movie is about an older woman (50!!!) Who cannot get her screenplay produced due to age discrimination so she sends in her younger nephew to pose as the writer. Not an original idea and not a very good movie with lousy acting, inane dialogue and a ridiculous plot. There is another plot concerning a writer with a crush or admiration for kirsties character and why this is included is a mystery. The actor who portrays kirsties brother is so wooden and miscast, it was torture to watch their scenes. What is there to say about this film. Avoid it.                                               |
| positive | positive | I saw this on the big screen and was encapsulated with it. The period of queen victorias younger years are a mystery and this is a perfect description of how a young girl was thrust into one of the highest roles in the world.the script is perfect, the acting is amazing, the history and attention to detail is out of this world. Emily blunt is perfect as victoria. Funny how her mother is played by elizabeth the 1st and william iv is played by prince albert! (think blackadder).this portrayal of victoria shows that she was a rebellious young woman once - im sure she would have been on jeremey kyle show if it had been around then: my mother and her boyfriend are trying to steal my life.a perfect piece of a major part of british and commonwealth history. |
| negative | negative | I wont describe the story, as that has been done elsewhere. We are great clive owen fans, and when our netflix recommended the movie, we were intrigued. No wonder we had never heard of this movie, because it was a bbc television movie back in 1992. hence, the poor production values, grainy image , jerky camera work and poor sound.but, you dont really mind the mechanics, because the story itself will put you to sleep. Its an interesting human story, but not at all compelling, and there is hardly any ending. You dont really care for the characters as their lives are as boring as your life watching this tedious movie. Save the two hours and do something to make the time more worthwhile.                                                                   |
| positive | positive | Peter bogdonavich has made a handful of truly great films, and they all laughed is one of his best. The cast couldnt be better equipped to play this light but slightly bittersweet screwball comedy. Interestingly enough, the witty, light touch bogdonavich so effortlessly employs gives the film a rather disarming emotional core. Fresh and immediate, the film starts with absolutely no explanation. Theres no soundtrack music to cue us. We meet the characters in action, and as bogdonavich glides down the streets of new york, the film unfolds effortlessly. Robby mullers camera captures it all with an understated simplicity that seems accidental, but surely isnt. The cast is terrific. In every way, a classic.                                                |

|          |          |                                                                                                                                                                                                                                                                                                                                                                                                                                                                                                                                                                                                                                                                                                                                                                                                                                                                                                                                                        |
|----------|----------|--------------------------------------------------------------------------------------------------------------------------------------------------------------------------------------------------------------------------------------------------------------------------------------------------------------------------------------------------------------------------------------------------------------------------------------------------------------------------------------------------------------------------------------------------------------------------------------------------------------------------------------------------------------------------------------------------------------------------------------------------------------------------------------------------------------------------------------------------------------------------------------------------------------------------------------------------------|
| negative | negative | <p>What a terrible movie. <b>The acting was bad, the pacing was bad, the cinematography was bad, the directing was bad, the special effects were bad.</b> You expect a certain degree of badness in a slasher, but even the killings were bad. first of all, the past event that set up the motive for the slaughter went on for 15 or 20 minutes. I thought it would never end. They could have removed 80% of it and explained what happened well enough. then, the victims were invited to the reunion in an abandoned school which still had all the utilities turned on. One of the victims thought this was a little odd, but they dismissed it and decided to break in anyway. finally, the killings were so fake as to be virtually unwatchable. there is no reason to watch this movie, unless you want to see some breasts, and not very good breasts at that. This movie makes showgirls virtually indistinguishable from citizen kane.</p> |
| positive | positive | <p>A very good wartime movie showing the effects of war on a hometown boy who loses his eyesight on Guadalcanal and must come home and re-adjust himself with the help of family and friends. <b>An excellent cast of actors helps make this movie very entertaining.</b> Eleanor Parkers role as the girlfriend was worthy of an Oscar nomination. She has such an innocence to her in this movie. Ann Doran's role was equally satisfying as was all of her small supporting roles. I especially like the hometown aura of pre-war Philadelphia. The hunting scene is very good. Of course the war scene on Guadalcanal truly showed the horror faced by our soldiers during this epic battle. A well-deserving film and one that should not be forgotten.</p>                                                                                                                                                                                       |
| positive | positive | <p><b>This is one of three 80s movies that I can think of that were sadly overlooked at the time and unfortunately, still overlooked.</b> One of the others was Clownhouse directed by Victor Salva, a movie horribly overlooked due to Salva's legal/sexual problems. Another would be Cameron's Closet which strikes me as somewhat underrated—not great, but not nearly as bad as the reviews I've seen. Paper House is well worth your time and I think that it is one of those very quiet films that will just stick in your brain for far longer than you might think. I mean, 10 years after I've seen it and I still give it some pause, whereas something that I might have seen 6 months ago has gone into the ether.</p>                                                                                                                                                                                                                    |
| negative | negative | <p>I'm trying to picture the pitch for Dark Angel. I'm thinking Matrix, I'm thinking Blade Runner, I'm thinking that chick that plays Faith in Angel, wearing shiny black leather - or some chick just like her, leave that one with us. Only - get this! <b>- well do it without any plot, dialogue, character, decent action or budget, just some loud bangs and a hot chick in shiny black leather straddling a big throbbing bike.</b> Fanboys dig loud bangs and hot chicks in shiny black leather straddling big throbbing bikes, right? flashy, shallow, dreary, formulaic, passionless, tedious, dull, dumb, humourless, desultory, barely competent. Live action anime without any action, or indeed any life. SF just the way Joe Fanboy likes it, in fact. :(</p>                                                                                                                                                                           |
| negative | negative | <p>I was staying in one night and got extremely bored around 2:00 a.m. so I flipped aimlessly through the channels and happened upon H.B.O. where this classic was playing. Initially I was happy to have caught something at the beginning, but my happiness faded about two minutes into the movie. The whole movie centered around an unattractive man who had a fear of females, four beautiful but empty-minded women who worked as waitresses at his uncle's diner, and his enormously fat and extremely miserable cousin who also works at the diner. <b>There are a few strange twists in this movie that make it somewhat interesting, but certainly not worth watching.</b> Basically, if you have nothing to do some night or just can't sleep medication works much better. However guys there is a lot of skin so it may be okay to watch with no sound, but even that can get annoying.</p>                                              |

|          |          |                                                                                                                                                                                                                                                                                                                                                                                                                                                                                                                                                                                                                                                                                                                                                                                                                                                                                                                                                                    |
|----------|----------|--------------------------------------------------------------------------------------------------------------------------------------------------------------------------------------------------------------------------------------------------------------------------------------------------------------------------------------------------------------------------------------------------------------------------------------------------------------------------------------------------------------------------------------------------------------------------------------------------------------------------------------------------------------------------------------------------------------------------------------------------------------------------------------------------------------------------------------------------------------------------------------------------------------------------------------------------------------------|
| negative | negative | <b>This is without a doubt one of the worst movies ever, i emphasize, ever made.</b> Whats worse, my old hero dolph is in it and hes starring it. Jesus... the story is actually quite good but the way its carried out made even my body hurt. The fighting scenes for starters are about as well choreographed as a fight between two drunks slugging it out in the gutter. The actors, except for dolph who kinda sucks also, perform so badly you cant help but wonder if their reason for being there is that theyre all friends of the director, who by the way must have been absent most, if not all, of the time. This is 12 million spent in an unimaginable way, because by the look of the effects and scenery, the cost cant be a cent above 1000.                                                                                                                                                                                                    |
| negative | negative | My nose is bent slightly out of shape as i write this. I had sent a previous comment on this film some weeks ago that has not yet appeared, so i assume it was rejected, even though it met all the usual guidelines.i found this film interesting for the first thirty minutes, particularly the performance of jordi moll, a veteran actor who has appeared in such major productions as blow and the alamo. Leonor watling is also quite good. <b>Unfortunately, everything sinks eventually under the weight of a truly awful, melodramatic script.</b> There is also an abundance of gratuitous nudity that does nothing to advance the narrative or lend even an impressionistic nuance to what is otherwise a beautifully filmed piece of art.an actual day trip to the beach at valencia would be much less arduous than having to encounter these fictional characters again anywhere, anytime.                                                           |
| positive | positive | Saw this film on dvd yesterday and was gob-smacked and flabbergasted. The unaffected acting of ddl just blew my mind, and i was surprised by the whole cast and its superb acting. All of the character were so authentic to me, i really took ddl for christy burns and brenda fricker for his mom. Go and see it! Youll cry your heart out, but youll experience a wonderful catharsis! <b>Besides, it teaches you one important lesson: determination is everything.</b> You may be a cripple in the poor suburbs of dublin, but when you are headstrong enough you will have no problems at all. If you can only operate your left foot you are still good enough to be a painter or a writer. The worst thing you can do when you are mentally challenged is to indulge in self-pity. It wont get you anywhere and the only person wholl pity you will be yourself.                                                                                           |
| positive | positive | I was bored one night and red eye was on and thought why not.red eye is one of the best movies in a long time.i mean i just got into the movie cause it was just so brilliant.the story is new and different.the movie also has two great leads in the movie with rachel mcadams as lisa reisert and cillian murphy as jackson rippner.the acting is just brilliant and you get the feel for the people in the movie.the music is just excellent, it give you chills and can also make you feel relax.i just love how the movie was just so well done and it never gets boring.red eye is just phenomenal. <b>Nothing more and nothing less.its a excellent thriller.overall, i enjoy red eye so much that i can watch it over and over again.if you like red eye, then i recommend elektra and cry wolf.i give red eye 9 out of 10.great movie</b>                                                                                                                |
| positive | positive | <b>A remarkable piece of documentary, giving a vivid depiction of a country deeply divided within itself (for further evidence, check out some of the comments on imdb...!).</b> Compares extremely favourably with oliver stones comandante (which is mainly an in-depth examination of fidel castros nostril hairs). I dont know whether chavez is everything he presents himself as being, or yet another in the long line of populist latin-american caudillos. Nor do i know whether he will be able to make good on the huge expectations he has clearly built up among the poor majority of venezuelans. Its hardly reasonable to expect a film like this to be able to answer such questions - but ive certainly now got a pretty vivid idea of whats at stake, and what it feels like to be caught up in the middle of a coup. Someone says in the film were making history, and thats exactly what the film feels like its capturing. Outstanding stuff. |



|          |          |                                                                                                                                                                                                                                                                                                                                                                                                                                                                                                                                                                                                                                                                                                                                                                                                                                                                                                                                                                 |
|----------|----------|-----------------------------------------------------------------------------------------------------------------------------------------------------------------------------------------------------------------------------------------------------------------------------------------------------------------------------------------------------------------------------------------------------------------------------------------------------------------------------------------------------------------------------------------------------------------------------------------------------------------------------------------------------------------------------------------------------------------------------------------------------------------------------------------------------------------------------------------------------------------------------------------------------------------------------------------------------------------|
| negative | negative | <b>This film was a major letdown.</b> The level of relentless cruelty and violence in this film was very disturbing. Some scenes were truly unnecessarily ugly and mean-spirited. The main characters were impossible to identify with or even sympathize with. The lead protagonists character was as slimy as they come. The sickroom/hothouse atmosphere lent itself to over-the-top theatrics. Little or nothing could be learned about the spanish civil war from this film. Fortunately, ive been to spain and realize this is not realistic! In addition, the use of same-sex attraction as a lurid horror was also very offensive and poorly handled, while the dvd is being packaged and advertised to attract gay viewers. The actors seemed uncomfortable in their roles,as if they were trying to distance themselves from this mess.i guess if you like watching children and pets being brutally killed,this film might especially appeal to you. |
| negative | negative | Visually disjointed and full of itself, the director apparently chose to seek faux-depth to expand a 5 minute plot into an 81 minute snore-fest. The moments that work in this film are very limited, and the characters dont even feel real. How could you feel invested in a main protagonist who was made so surreal? <b>Substantively and stylistically, it all feels like a quirky dream sequence.</b> Jarring irregular camera work, awkward silences and gaps in action, and whats with the little spider image crawling across the screen? Whoever thought of that needs to go back to film school. It added no meaning, just cheese, and didnt even stylistically work with the rest of the film (assuming the film even had a style, which is a close call). What a flop.                                                                                                                                                                             |
| positive | positive | Who would have thought that such an obscure little film could be so haunting and touching? I am really impressed. Its a shame that more people have not seen it. I loved, as always, hans zimmers score. <b>And what a directorial debut by bernard rose!</b> Yet i wonder if i should call this a horror film. It could easily be argued that it is a fantasy or a drama as well. Well, regardless, i love the interpretive potential it has. Everything and everyone in annas (played by charlotte burke)dreams represents a real conflict in her life...the house itself, the tree, mark, the lighthouse, etc. It is the many details such as these that make the film so good for repeated viewings. I hope i come across another little movie as loaded with emotion and psychological meaning as this one some time soon.                                                                                                                                 |
| positive | positive | <b>This is what a movie should be when trying to capture the essence of that which is very surreal.</b> It has this hazy overtone that is rarely captured on film, it feels like a dream sequence and really moves you into a dark haunting memory. The kids were extremely believable and i do expect some things to come of them in the future. Very natural acting for such young ones, i dont know if bill pulled it out of them or there just that good, but no the less excellent. Bill scored as far as im concerned and for the comment by kevnjeff about mr. paxtons bad acting, what can one do in that role. He played the part rather well in my opinion. This is coming from someone who said hamlet was good (the ethan hawke version?) Wow..... do not listen to his comments. Great flick to make you feel really uncomfortable, if thats what you want? Cinematography gets an above the average rating also.                                  |
| negative | negative | <b>This was probably the worst movie ever, seriously.</b> I could actually do better myself, it wasnt even set up properly. Its like this movie had a \$5 budget and left with change. Dont watch it. I didnt even get all the way through this movie, had to turn it off. Ive give this a 1 in 10 because it was hilarious how the producer of this movie wanted it to be a horror movie, but actually turned into a really bad comedy. Basically, a bunch of girls crashed into a car, broke a headlight, and the owner of that car went after them. The bit that i saw was a women with a gun telling a load of girls to take all their clothes off, what the hell? It must be some kind of cheesy porn movie as well.                                                                                                                                                                                                                                       |

|          |          |                                                                                                                                                                                                                                                                                                                                                                                                                                                                                                 |
|----------|----------|-------------------------------------------------------------------------------------------------------------------------------------------------------------------------------------------------------------------------------------------------------------------------------------------------------------------------------------------------------------------------------------------------------------------------------------------------------------------------------------------------|
| positive | positive | Cannot believe a movie that can be made that good in 1987 and is virtually unknown in the west. Not to repeat other reviews here. <b>The score is very good and moving.</b> Literally it means dawn please never comes - when it comes, the beautiful ghost and the lover will be apart forever. After 24 years, joel and leslie still look great. I enjoyed joel in god of gamblers and many movies by leslie including better tomorrow.                                                       |
| negative | negative | The movie was disappointing. The book was powerful. The views and the learning of little tree were powerfully portrayed in the book. The movie just coasted along and finally dribbled away. <b>Still a nice tale for kids.</b>                                                                                                                                                                                                                                                                 |
| positive | positive | <b>This movie was one of the best disney movies ive ever seen.</b> Great for the entire family to watch. The ideas may be a little far-fetched, but its a feel-good comedy and the acting is great. Love the little boy, j.p. and academy award winner adrien brodys part may have been very short, but very memorable. Highly recommended.                                                                                                                                                     |
| positive | positive | This has to be one of the most beautiful, moving, thought provoking films around. Its good family entertainment and at the same time makes you think very hard about the issues involved. Every time i see the ghost of zac riding the bike through the puddle at the end i cant help but cry my eyes out. <b>John thaws performance is so touching and it is a shame he is no longer with us.</b> Gone but not forgotten. A outstanding film. Full marks.                                      |
| negative | negative | Someone told me that this was one of the best adult movies to date. I have since discredited everything told to me by this individual after seeing this movie. <b>Its just terrible.</b> Without going into lengthy descriptions of the various scenes, take my word for it, the sex scenes are uninteresting at best. Jenna in normal street clothes in the beginning was the highlight of the film (she does look good) but its all downhill from there.                                      |
| negative | negative | I was looking forward to this ride, and was horribly disappointed.and i am very easily amused at roller coaster and amusement park rides.the roller coaster part was just okay - and that was all of about 30 seconds of a 90 second ride. <b>It was visually dull and poorly executed.</b> It was trying desperately to be like a mixture of the far superior indiana jones and space mountain rides and disneyland, and failed in every aspect.it was not thrilling or exciting in the least. |
| positive | positive | Well, i thoroughly enjoyed this movie. It was funny and sad and yes, the guy andie macdowell shagged was hot. <b>Interesting, realistic characters and plots as well as beautiful scenery.</b> I think my mum would like it. I still think they should have been allowed to call it the sad f**kers club though...                                                                                                                                                                              |
| negative | negative | <b>I dont know if the problem i had with this movie is that i was not able to capture the way movies were done in the past but i believe that this one did not miss to make use of any of the the fashionable conventions available in the 40s to make a film.</b> If you dont have anything better to do my advise is not to watch this movie but to read a book or to go out for a walk.                                                                                                      |
| negative | negative | I actually had hopes for this movie since ive seen kari in a few other things and think she has some talent. Alas, this dud is a case study in what not to do in a screenplay. Completely undefined characters without a shred of likeability, and no plot whatsoever. <b>Is it a road/buddy/comedy/thriller/romance/drama?</b> The filmmakers dont have a clue, and neither do we.                                                                                                             |
| positive | positive | <b>Very heart warming and uplifting movie.</b> Outstanding performance by alisan porter (curly sue). I saw this movie when it was first released and enjoyed it immensely. I just caught it again on the mplex channel, and curly sue touched my heart again.                                                                                                                                                                                                                                   |
| positive | negative | The first time you see the second renaissance it may look boring. Look at it at least twice and definitely watch part 2. it will change your view of the matrix. Are the human people the ones who started the war ? <b>Is ai a bad thing ?</b>                                                                                                                                                                                                                                                 |



|          |          |                                                                                                                                                                                                                                                                                                                                                                                                                                                               |
|----------|----------|---------------------------------------------------------------------------------------------------------------------------------------------------------------------------------------------------------------------------------------------------------------------------------------------------------------------------------------------------------------------------------------------------------------------------------------------------------------|
| positive | positive | There are few really hilarious films about science fiction but this one will knock your sox off. The lead martians jack nicholson take-off is side-splitting. The plot has a very clever twist that has be seen to be enjoyed. <b>This is a movie with heart and excellent acting by all.</b> Make some popcorn and have a great evening.                                                                                                                     |
| negative | negative | ...shut it off. <b>The prologue with fu manchus birthday, and the opening credits of the assassins training, is amusing.</b> Then it drops off faster than hair sprayed with neat. Look for a cameo by cato in the beginning, with a figurative wink at the audience.                                                                                                                                                                                         |
| negative | negative | If you are hoping for anything new, you have chosen the wrong movie. Who can think that a movie that is a virtual replay of its predecessors can be good. Maybe the producer and maybe the director but hopefully they were not serious when they made this thing. <b>This whole movie is like making a greatest hits dvd of the 1st 3 films, but changing the actors.</b> Bhhaaad.                                                                           |
| positive | positive | <b>Of course, the story line for this movie isnt the best, but the dances are wonderful.</b> This story line is different from other astaire-rogers movies in that neither one is chasing the other. The dancing of fred and ginger is what makes this movie.                                                                                                                                                                                                 |
| negative | negative | <b>This movie got extremely silly when things started to happen.</b> I couldnt care less about any of the characters; susan walters was so annoying, and the leading actor (forget his name) also got on my nerves. Cant quite remember how it ended and so forth but the whole idea of aliens possessing human bodies and all just seemed stupid in this film, things didnt quite carry off. My dad told me its s stupid movie...i shouldve listened to him. |
| positive | positive | This movie is perfect for families to watch together. It is a great film and it deserves more credit. <b>The special effects are stunning and spectacular.</b> Everyone who has children should share this with theirs.                                                                                                                                                                                                                                       |
| positive | positive | I saw the movie before i read the michelle magorian book and i enjoyed both. The movie, more than the book, made me come close to tears on several occasions. <b>This film touches the deepest points of the human soul and never lets go.</b> I encourage as many people to watch this masterpiece as much and as soon as possible. I give it ten stars.                                                                                                     |
| negative | negative | This movie was worth five punches on my hurter card. I saw this while stationed in virginia in the mid 70s. I saw it alone so i was not distracted while i watched it. It sucked. <b>It was the most ridiculous, total waste of celluloid ive ever seen.i know that others who have reviewed this movie have thought that it was awesome.</b> I offer you this: if it was so awesome what was its box office take? End of discussion.                         |
| positive | positive | One of the best (if not the best) stephen kings screenings. <b>Dark as dark can be, surprising non-hollywood ending, terrifying atmosphere, amazing book adaptation, outstanding cast, educational (dont play with afterlife), in short - everything an excellent horror should be...my favorite horror movie, straight 10+.</b>                                                                                                                              |
| negative | negative | You get 5 writers together, have each write a different story with a different genre, and then you try to make one movie out of it. Its action, its adventure, its sci-fi, its western, its a mess. <b>Sorry, but this movie absolutely stinks.</b> 4.5 is giving it an awefully high rating. That said, its movies like this that make me think i could write movies, and i can barely write.                                                                |
| negative | negative | <b>Malcolm mcdowell has not had too many good movies lately and this is no different.</b> Especially designed for people who like yellow filters on their movies.                                                                                                                                                                                                                                                                                             |
| positive | negative | <b>Nothing new is this tired serio-comedy that wastes the talents of danny glover and whoopi goldberg.</b> Considering that this was produced by the stars and spike lee, its pretty tame and tired stuff. And how come the whoop never changes her hair or glasses over the many years this film covers? Blah!                                                                                                                                               |

|          |          |                                                                                                                                                                                                                                                                         |
|----------|----------|-------------------------------------------------------------------------------------------------------------------------------------------------------------------------------------------------------------------------------------------------------------------------|
| positive | positive | More eeriness and dark secrets released in the final parts of lars von triers fantastic horror satire the kingdom... much more is revealed and the ending just leaves you begging for more. <b>Plus a great performance from udo kier in a more substantial role...</b> |
|----------|----------|-------------------------------------------------------------------------------------------------------------------------------------------------------------------------------------------------------------------------------------------------------------------------|

Table 1: Key sentences picked by L2X for ten randomly selected samples. The true labels and the labels from the model are also shown in the first two columns.

### 3 Examples of selected words by L2X

Table 2 contains example reviews where key words selected by our algorithm are highlighted in yellow.

Table 2: Key words picked by L2X for ten randomly selected samples. The true labels and the labels from the model are also shown in the first two columns. (below)

| Truth    | Predicted | Key words                                                                                                                                                                                                                                                                                                                                                                                                                                                                                                                                                                                                                                                |
|----------|-----------|----------------------------------------------------------------------------------------------------------------------------------------------------------------------------------------------------------------------------------------------------------------------------------------------------------------------------------------------------------------------------------------------------------------------------------------------------------------------------------------------------------------------------------------------------------------------------------------------------------------------------------------------------------|
| positive | positive  | <START> this <b>comic book</b> style film is <b>funny</b> <b>has</b> <b>nicely</b> <b>paced</b> action and a <b>great</b> <b>futuristic</b> style to it writer steven de <UNK> who also wrote <UNK> gives <UNK> plenty of lines to <UNK> out send me a copy after <UNK> a contract and <UNK> a <UNK> into the <UNK> back what a pain in the neck after <UNK> <UNK> with <UNK> <UNK> he had to split after <UNK> his body between his legs and finally as <UNK> <UNK> through a <UNK> <UNK> his own face <UNK> <UNK> now that hit the spot <UNK> enough bears some similarities total <b>recall</b> another sci fi flick <b>starring</b> <UNK>            |
| negative | positive  | <START> anyone that has see <UNK> child <UNK> knows that this is a director that can do better let's hope it was not a case of too many hands in the pot <UNK> anyone and that is was a case of second feature <UNK> the characters are one <b>dimensional</b> and over used the scenery is <b>terrific</b> <b>however</b> and <UNK> the <UNK> <UNK> <b>beautifully</b> br br the cinematography is <b>great</b> shot almost entirely <b>outside</b> the images are <UNK> and beautiful you can almost <UNK> the wind <b>blowing</b> through the leaves br br technically this movie is <b>as</b> sound as they come it just <b>lacks</b> a <b>heart</b> |
| negative | negative  | <START> mere <b>thoughts</b> of going <UNK> aka <UNK> <UNK> make me want to <UNK> throwing yourself out a window would <b>be</b> better than watching this movie <b>it's</b> <b>not</b> even a supposed so <b>bad</b> <b>it's</b> <b>good</b> movie i would <b>spend</b> <b>money</b> to buy copies of this movie and burn them so that people can't see it <b>oh</b> the pain the pain                                                                                                                                                                                                                                                                  |
| positive | positive  | <START> this movie <b>was</b> on british tv last night and is <b>wonderful</b> strong <b>women</b> <b>great</b> music most of the time and just makes <b>you</b> <b>think</b> we do have stereotypes of what older people ought to do and there are <b>fantastic</b> <b>cameos</b> of the <UNK> but worried children getting near to my <b>best</b> movie <b>ever</b>                                                                                                                                                                                                                                                                                    |
| negative | negative  | <START> i like <b>animated</b> <b>shows</b> <b>i</b> <b>enjoy</b> the nick fare pretty much including hey arnold but moving a tv show to the big screen isn't easy and this just <b>didn't</b> feel big enough it was more like a long <b>episode</b> of the show and it just <b>didn't</b> move along that well judging by the behavior of the kids we had with <b>us</b> it didn't score that <b>well</b> with them <b>either</b>                                                                                                                                                                                                                      |
| positive | positive  | <START> <b>brilliant</b> <b>kung fu</b> <b>scenes</b> <b>loads</b> of melodrama <UNK> <UNK> symbolism and an unhappy end makes <UNK> kid an <b>unforgettable</b> <b>film</b> <b>br</b> br one of the <UNK> <b>subtitles</b> i've <b>seen</b>                                                                                                                                                                                                                                                                                                                                                                                                             |
| positive | positive  | <START> this is a <b>refreshing</b> <b>enjoyable</b> movie if you enjoyed four <UNK> and a funeral <UNK> friends etc you will see a number of familiar and talented actors made me laugh made me sad <b>i</b> <b>view</b> movies for entertainment and <b>english</b> <b>set</b> movies generally <b>fit</b> <b>that</b> <b>bill</b> for me <b>enjoy</b>                                                                                                                                                                                                                                                                                                 |

|          |          |                                                                                                                                                                                                                                                                                                                                                                                                                                                                                                                                                                                                            |
|----------|----------|------------------------------------------------------------------------------------------------------------------------------------------------------------------------------------------------------------------------------------------------------------------------------------------------------------------------------------------------------------------------------------------------------------------------------------------------------------------------------------------------------------------------------------------------------------------------------------------------------------|
| negative | positive | <START> anyone who loved the two classic novels by edward <UNK> will be disappointed in this film all the magic and romance have been <UNK> out of his original story of a girl who does a good <UNK> for a mysterious old lady and given three in return three what not three wishes but three <UNK> into the <UNK> on a <UNK> <UNK> br br the first novel is time at the top the second is all in good time                                                                                                                                                                                              |
| positive | positive | <START> one of the most interesting movies to be <UNK> as <UNK> <UNK> <UNK> is a rich text full of wonderful insight he wrote it in <UNK> with <UNK> man <UNK> and barry white who appear in the film as well the racist imagery can often be disturbing but the message of the movie was so powerful that the <UNK> gave it an <UNK> but only <UNK> br br i highly recommend this movie to anyone who is interested in an <UNK> of the <UNK> atmosphere of racism that bakshi attempts to <UNK> wonderful stuff                                                                                           |
| positive | positive | <START> this is a top <UNK> film this year although <UNK> <UNK> comes close the director <UNK> made couple of years back another nice little film called <UNK> <UNK> <UNK> i was in love with a desperate woman <UNK> is truly true to life beautiful film of one saturday afternoon in a little village town the actors are maybe not so handsome or beautiful but they do act beautifully i certainly do hope that many of them get <UNK> <UNK> <UNK> oscar next spring i think this film could make it <UNK> as well                                                                                    |
| negative | negative | <START> i hired this movie expecting a few laughs hopefully enough to keep me <UNK> but i was <UNK> mistaken this movie showed very minimal moments of humour and the pathetic jokes had me <UNK> with shame for ever <UNK> it aimed at an age group of 10 15 this movie will certainly leave viewers outside of these <UNK> feeling very <UNK> worth no more than 3 <UNK> highly <UNK> for anyone not wanting to waste 2 hours of their lives                                                                                                                                                             |
| positive | positive | <START> wonderful movie with good story great humour some great one liners and a soundtrack to die for br br i've seen it 3 times so far br br the american audiences are going to love it                                                                                                                                                                                                                                                                                                                                                                                                                 |
| negative | negative | <START> i usually try to <UNK> reasonably well <UNK> <UNK> of films but i can not believe this got past the script stage the dialogue is appalling the acting very <UNK> the accents just awful and the direction and pacing is <UNK> at best br br i don't remember the last time i saw a film quite this bad joseph <UNK> pretty as he is might just have killed his career as quickly as it started br br the island of doctor <UNK> was no worse than this garbage                                                                                                                                     |
| negative | positive | <START> i saw this movie a few days ago what the hell was that br br i like movies with brian <UNK> they are funny and enjoyable when i saw a name of this title and genre i thought great this one could be really good some parody for <UNK> or another gore movies but then i read a preview and thought right it could be good anyway but it wasn't br br my opinion if like movies they look little bit like documentary with little bit of comedy try some <UNK> movies or alien <UNK> they are really about something this one was empty br br and put a comedy to title no comment really bad joke |

|          |          |                                                                                                                                                                                                                                                                                                                                                                                                                                                                                                                                                                                                                                                                                                                                                                                                                                                                                                                                                                                |
|----------|----------|--------------------------------------------------------------------------------------------------------------------------------------------------------------------------------------------------------------------------------------------------------------------------------------------------------------------------------------------------------------------------------------------------------------------------------------------------------------------------------------------------------------------------------------------------------------------------------------------------------------------------------------------------------------------------------------------------------------------------------------------------------------------------------------------------------------------------------------------------------------------------------------------------------------------------------------------------------------------------------|
| negative | negative | <p>&lt;START&gt; i expected to enjoy a <b>romantic</b> comedy featuring hip hop but was <b>disappointed</b> on many levels first of all the story is so <b>badly</b> &lt;UNK&gt; as to make it almost <b>unbearable</b> second the setting acting and story <b>are not</b> very authentic or believable third there are a lot more good black actors to choose from than these standard picks how about some originality third there were very few hip hop songs played in &lt;UNK&gt; if any none &lt;UNK&gt; really central overall film was a great <b>disappointment</b> but the <b>editing</b> style was very <b>interesting</b> and almost made the film <b>worthwhile</b></p>                                                                                                                                                                                                                                                                                           |
| negative | negative | <p>&lt;START&gt; i'm <b>sorry</b> but this is <b>just awful</b> i <b>have</b> told people about this film and some of the <b>bad</b> acting that is in it and they almost <b>don't</b> believe me there is <b>nothing wrong</b> with the idea modern day japanese troops get pulled back in time to the days of &lt;UNK&gt; &lt;UNK&gt; and with their modern weapons are a match for almost everything when the troops first realise something strange is happening does every single person in the back of the &lt;UNK&gt; need to say hey my watch has stopped <b>imagine</b> lines like that being repeated 15 times before they say anything else and you <b>have</b> the movie's <b>lack</b> of &lt;UNK&gt; in a &lt;UNK&gt;</p>                                                                                                                                                                                                                                         |
| positive | positive | <p>&lt;START&gt; this is easily a 9 &lt;UNK&gt; &lt;UNK&gt; known more for comic roles in the earlier part of his acting career does a <b>stunning</b> even &lt;UNK&gt; <b>stunning</b> job of &lt;UNK&gt; dr &lt;UNK&gt; a legendary french serial killer br br he is just so <b>believable</b> <b>at</b> every and any moment in the film that the actor completely &lt;UNK&gt; behind the character only the very <b>best</b> ever achieve this &lt;UNK&gt; and when they do it is only in a handful of parts at <b>best</b> br br the whole story a <b>real</b> story which happened in 20th century france is so <b>powerful</b> so <b>sinister</b> it makes for a very <b>strong</b> film that one &lt;UNK&gt; for a long long time</p>                                                                                                                                                                                                                                  |
| negative | negative | <p>&lt;START&gt; i <b>went</b> to see this film based on the review by &lt;UNK&gt; and &lt;UNK&gt; not only did i get &lt;UNK&gt; but i <b>took some friends</b> along and <b>had</b> to spend the <b>rest</b> of the day &lt;UNK&gt; &lt;UNK&gt; for making them sit through this <b>pointless crap</b> <b>after</b> this i never went to see a movie based <b>solely</b> on &lt;UNK&gt; &lt;UNK&gt; advice</p>                                                                                                                                                                                                                                                                                                                                                                                                                                                                                                                                                               |
| negative | negative | <p>&lt;START&gt; a <b>boring</b> movie about a <b>boring</b> town in the 50's how can <b>anyone</b> think this is a <b>classic</b> the producer pretty much ended his career by pushing his girlfriend &lt;UNK&gt; &lt;UNK&gt; into several movies that were way above her acting <b>ability</b> i think this movie gives an <b>insight</b> to how <b>bad</b> peter &lt;UNK&gt; <b>future</b> movies were going to be &lt;UNK&gt; &lt;UNK&gt; career took a &lt;UNK&gt; after being in several movies that peter &lt;UNK&gt; produced it wasn't until &lt;UNK&gt; that her career started to come back i thought the acting was <b>poor</b> rendition of the &lt;UNK&gt; i <b>have</b> noticed that this movie hasn't been shown in the us the only place i have watched it was &lt;UNK&gt; in europe late at night</p>                                                                                                                                                        |
| negative | negative | <p>&lt;START&gt; <b>don't</b> expect much from this film in many ways this film <b>resembles</b> a film that &lt;UNK&gt; day starred in in &lt;UNK&gt; title julie in this film &lt;UNK&gt; who was a flight &lt;UNK&gt; &lt;UNK&gt; in those days &lt;UNK&gt; the air craft after her &lt;UNK&gt; husband played by <b>louis</b> &lt;UNK&gt; shot the captain she did a far <b>better</b> job more convincing than kim &lt;UNK&gt; who took control of a &lt;UNK&gt; and manage to land it without much help from the control &lt;UNK&gt; i know a little about &lt;UNK&gt; &lt;UNK&gt; i use to be a flight &lt;UNK&gt; myself like i said do not expect much from this film it was <b>done</b> on a <b>cheap</b> budget the <b>producers</b> were to <b>cheap</b> to use a plane with the name of a &lt;UNK&gt; on it &lt;UNK&gt; is one name that several movies have used the <b>only</b> writing on this plane was the name of the company that made the &lt;UNK&gt;</p> |

|          |          |                                                                                                                                                                                                                                                                                                                                                                                                                                                                                                                                                                                                                                                                                                                                                                                                                                                                                                                                                                                               |
|----------|----------|-----------------------------------------------------------------------------------------------------------------------------------------------------------------------------------------------------------------------------------------------------------------------------------------------------------------------------------------------------------------------------------------------------------------------------------------------------------------------------------------------------------------------------------------------------------------------------------------------------------------------------------------------------------------------------------------------------------------------------------------------------------------------------------------------------------------------------------------------------------------------------------------------------------------------------------------------------------------------------------------------|
| positive | negative | <p>&lt;START&gt; very few chess movies have been made over the last couple of years but this one is more than just a <b>chess</b> movie its a story about the need to be <b>loved</b> and the need to win it john &lt;UNK&gt; plays a &lt;UNK&gt; &lt;UNK&gt; man <b>nothing</b> matters to him accept &lt;UNK&gt; &lt;UNK&gt; and &lt;UNK&gt; pieces the game &lt;UNK&gt; him as a person when he &lt;UNK&gt; a game he &lt;UNK&gt; the one thing that makes sense to him and john &lt;UNK&gt; &lt;UNK&gt; this in a <b>beautiful</b> <b>fashion</b> even the <b>love</b> of a woman was <b>not</b> enough to save him from his sad existence it makes you wonder if there other &lt;UNK&gt; out there who &lt;UNK&gt; about the game i am sure they are if you are a chess &lt;UNK&gt; it won't hurt to watch it its an <b>intelligent</b> piece of work <b>laid</b> out properly and executed well it &lt;UNK&gt; its &lt;UNK&gt; <b>unfortunately</b> i doubt if there will be sequel</p> |
| positive | positive | <p>&lt;START&gt; this movie is incredibly <b>realistic</b> and i feel does a <b>great</b> justice to the crime that many people do not understand because of a <b>lack</b> of experience the many people who think they could &lt;UNK&gt; what goes through a &lt;UNK&gt; mind are <b>arrogant</b> as a victim i feel that dawson did a <b>fantastic</b> job in her role of &lt;UNK&gt; i agree that this is an incredibly <b>brave</b> film this <b>looks</b> at rape from a different more realistic &lt;UNK&gt; than any other movie i've ever seen on the subject the end did drag on a bit long but i know that many victims imagine this <b>kind</b> of justice since the chances of an &lt;UNK&gt; being sent to jail for their crime is around <b>1</b> it's good to see a movie that sticks closer to reality than most would <b>dare</b> to</p>                                                                                                                                     |
| negative | negative | <p>&lt;START&gt; i got a copy from the writer of this movie on &lt;UNK&gt; i have to say it is <b>pathetic</b> and just plain <b>painful</b> to watch the two cops act but i watched the movie as a <b>joke</b> and since it is a homage to &lt;UNK&gt; underground which i happened to have seen it is in my book as an <b>awesome</b> movie its quality and everything about it is pretty <b>bad</b> but <b>its</b> <b>entertaining</b> and something to talk about amongst your friends reminds me of &lt;UNK&gt; but good stuff i <b>recommend</b> seeing this under two &lt;UNK&gt; if you are <b>bored</b> and need a good laugh or high otherwise just let it be recommended &lt;UNK&gt; for sure o and the killings are pretty <b>funny</b> like when the zombie &lt;UNK&gt; the satan &lt;UNK&gt; dick off and &lt;UNK&gt; someone in the head with it</p>                                                                                                                           |
| negative | negative | <p>&lt;START&gt; a <b>collection</b> of &lt;UNK&gt; scenes and &lt;UNK&gt; <b>takes</b> edited together and with added voice over to make it appear to take place after the events of the first pretty cool idea but &lt;UNK&gt; scenes are <b>left</b> on the cutting room floor for a reason and this is further proof as it's just <b>not</b> as funny as &lt;UNK&gt; and really <b>let's</b> face it that film wasn't exactly comedy gold either so you get a &lt;UNK&gt; <b>worse</b> than one that was &lt;UNK&gt; <b>funny</b> in my eyes that still puts it one or two &lt;UNK&gt; above kicking and <b>screaming</b> or &lt;UNK&gt; &lt;UNK&gt; your &lt;UNK&gt; that the wedding &lt;UNK&gt; is a return to old school form no &lt;UNK&gt; intended br br my <b>grade</b> <b>d</b></p>                                                                                                                                                                                              |
| negative | negative | <p>&lt;START&gt; first of all this movie is not a comedy unless you really force yourself you can hardly laugh secondly the movie is slow and <b>boring</b> the acting is not bad but not special there is a lucky luke comic about two families one with big &lt;UNK&gt; and one with big ears fighting each other in a small town you will laugh much more if you read this <b>instead</b> of <b>wasting</b> your time with this movie &lt;UNK&gt; and &lt;UNK&gt; are <b>not</b> the best source to make a good comedy and this movie does <b>nothing</b> more than &lt;UNK&gt; this rule there is a similar subject comedy &lt;UNK&gt; the home &lt;UNK&gt; this had some good moments my final comment is do <b>not</b> <b>waste</b> your time and <b>money</b> to watch this <b>uninspired</b> and <b>boring</b> film</p>                                                                                                                                                               |



|          |          |                                                                                                                                                                                                                                                                                                                                                                                                                                                                                                                                                                                                                                                                                                                                                                                                                                                                                                                |
|----------|----------|----------------------------------------------------------------------------------------------------------------------------------------------------------------------------------------------------------------------------------------------------------------------------------------------------------------------------------------------------------------------------------------------------------------------------------------------------------------------------------------------------------------------------------------------------------------------------------------------------------------------------------------------------------------------------------------------------------------------------------------------------------------------------------------------------------------------------------------------------------------------------------------------------------------|
| negative | negative | <p>&lt;START&gt; this was a fairly creepy movie i found the music to be effective for this the &lt;UNK&gt; mario took of the village were also &lt;UNK&gt; however i had three problems with this film one is that the lighting was very dark so <b>some</b> of the time it was hard to tell what was going on but this may have just <b>been</b> my copy the second is that the very beginning is <b>not</b> explained very <b>well</b> and i'm still <b>not</b> sure what was going on there the third problem is that i didn't understand the ending but <b>apparently</b> some people do of course there are also the usual problems of people doing stupid things and the male lead is <b>very</b> <b>70s</b> all in all watchable but <b>not</b> even close to being a <b>favorite</b></p>                                                                                                               |
| positive | negative | <p>&lt;START&gt; <b>i'm</b> <b>rather</b> <b>surprised</b> that no reviewer so far has commented on the rather &lt;UNK&gt; chess &lt;UNK&gt; in &lt;UNK&gt; game as white against an &lt;UNK&gt; &lt;UNK&gt; immediately before the final despite the use of jonathan &lt;UNK&gt; as &lt;UNK&gt; chess expert &lt;UNK&gt; is shown winning the <b>game</b> with an illegal move in between the &lt;UNK&gt; cuts away and <b>back</b> to the board it is <b>not</b> hard to spot that after &lt;UNK&gt; combination &lt;UNK&gt; in a queen sacrifice his &lt;UNK&gt; on &lt;UNK&gt; is still <b>&lt;UNK&gt;</b> by &lt;UNK&gt; &lt;UNK&gt; at &lt;UNK&gt; against his king in the <b>corner</b> at &lt;UNK&gt; thus he is <b>unable</b> to play the &lt;UNK&gt; &lt;UNK&gt; move &lt;UNK&gt; &lt;UNK&gt; which would be illegal but he's shown doing so to &lt;UNK&gt; &lt;UNK&gt; from the <b>audience</b></p> |
| positive | positive | <p>&lt;START&gt; this for me was a <b>wonderful</b> <b>introduction</b> to the talents and <b>beauty</b> of &lt;UNK&gt; davies she is not only gorgeous but <b>hilarious</b> in this film i believe that &lt;UNK&gt; ball may have &lt;UNK&gt; her later career on &lt;UNK&gt; style that could be &lt;UNK&gt; &lt;UNK&gt; <b>beauty</b> &lt;UNK&gt; direction is light but sure handed the story is a &lt;UNK&gt; of course but the acting is &lt;UNK&gt; contemporary and the star watching element for fans of the silent era with many cameos <b>adds</b> to the overall <b>fun</b> it &lt;UNK&gt; the elements of slapstick with adult drama and good old <b>timeless</b> romance quite <b>well</b> for all movie fans who have a &lt;UNK&gt; jerk reaction to watching silent films sit through this one and it may change your attitude br br</p>                                                       |
| negative | negative | <p>&lt;START&gt; i still find it difficult to &lt;UNK&gt; that a movie as <b>bad</b> as this could be made in hollywood the acting and story is simply <b>pathetic</b> the direction is <b>awful</b> i don't see any logic behind this trash <b>except</b> may be that the director had <b>nothing</b> good to do i took me ten <b>minutes</b> to realize that i had <b>wasted</b> my precious thirty &lt;UNK&gt; it filled me with &lt;UNK&gt; that i was going to waste some more time of my life on this <b>crap</b> i bet the movie was made in less than a day i don't know what category it falls into please <b>avoid</b> this movie at all costs just do <b>anything</b> even bang your head against walls but don't go for this movie</p>                                                                                                                                                             |
| positive | positive | <p>&lt;START&gt; if you are like me then you will <b>love</b> this <b>great</b> coming of age teen movie i think it is up there with &lt;UNK&gt; book of love high school usa &lt;UNK&gt; &lt;UNK&gt; girl &lt;UNK&gt; all <b>great</b> movies set in the &lt;UNK&gt; 50s early 60s and it has a wonderful soundtrack not as many songs as in some of these type of movies but still <b>great</b> it is all so <b>very</b> <b>funny</b> at times and has a great love interest all the young cast are <b>great</b> i wish there were more type of these <b>wonderful</b> movies my <b>favourite</b> movie of all time is back to the future when marty &lt;UNK&gt; &lt;UNK&gt; back to &lt;UNK&gt; well in these <b>wonderful</b> movies it stays in the &lt;UNK&gt; 50s early 60s there are some movies of this type better than this but not many</p>                                                        |

|          |          |                                                                                                                                                                                                                                                                                                                                                                                                                                                                                                                                                                                                                                                                                                                                                                                                                                                                                                                                                                                                                                                       |
|----------|----------|-------------------------------------------------------------------------------------------------------------------------------------------------------------------------------------------------------------------------------------------------------------------------------------------------------------------------------------------------------------------------------------------------------------------------------------------------------------------------------------------------------------------------------------------------------------------------------------------------------------------------------------------------------------------------------------------------------------------------------------------------------------------------------------------------------------------------------------------------------------------------------------------------------------------------------------------------------------------------------------------------------------------------------------------------------|
| negative | negative | <p>&lt;START&gt; this movie pretty much <b>sucked</b> i'm in the army and the soldiers depicted in this movie are <b>horrible</b> <b>if</b> your in the military and you see this movie you'll laugh and be upset the entire movie because of the way they acted as a &lt;UNK&gt; it was <b>ridiculous</b> <b>they</b> acted like a bunch of normal people with army &lt;UNK&gt; on not knowing what to do it was a pretty gory movie i'd <b>have</b> to say the least there was a couple scenes where they try to make you jump i'd <b>recommend</b> seeing it if you are <b>bored</b> and want to see a violent gory movie it will be a better movie also <b>if</b> your not in the military i also would <b>have</b> to say i liked the first one better than this one</p>                                                                                                                                                                                                                                                                         |
| negative | negative | <p>&lt;START&gt; did anyone <b>read</b> the script this <b>has</b> to be some of the <b>worst</b> writing and directing of the entire year three great actors paul &lt;UNK&gt; rachel &lt;UNK&gt; and &lt;UNK&gt; richardson couldn't pull this <b>one</b> out about two &lt;UNK&gt; it looked like &lt;UNK&gt; eyes were saying i <b>can't</b> believe i signed the contract it's not the <b>worst</b> movie i ever saw but it's on the really really <b>bad</b> christmas movie list <b>not</b> enough lines but what else can be said okay the movie just <b>doesn't</b> move with &lt;UNK&gt; con man dialogue his character is just a creepy guy that you just can't get past it was just a &lt;UNK&gt; <b>walk</b> through that no one seemed to be able to get into</p>                                                                                                                                                                                                                                                                        |
| negative | negative | <p>&lt;START&gt; mary &lt;UNK&gt; becomes the &lt;UNK&gt; of a scottish &lt;UNK&gt; after the death of her father and then has a romance as fellow &lt;UNK&gt; snow &lt;UNK&gt; said the film is rather &lt;UNK&gt; to begin some of it is amusing such as &lt;UNK&gt; &lt;UNK&gt; her &lt;UNK&gt; to church while some of it is <b>just there</b> all in all the story is <b>weak especially</b> the &lt;UNK&gt; <b>contrived</b> romance plot <b>line</b> and its climax the transfer is so <b>dark</b> it's difficult to appreciate the scenery but even &lt;UNK&gt; for that this <b>doesn't</b> appear to be director &lt;UNK&gt; &lt;UNK&gt; <b>best</b> work &lt;UNK&gt; and &lt;UNK&gt; &lt;UNK&gt; once more in the somewhat more &lt;UNK&gt; 'the <b>poor</b> little rich girl ' &lt;UNK&gt; &lt;UNK&gt; as a child character</p>                                                                                                                                                                                                           |
| positive | positive | <p>&lt;START&gt; this is the most &lt;UNK&gt; documentary i have ever seen it was a simple and <b>breathtaking</b> view of a beautiful idea based on &lt;UNK&gt; of the hidden &lt;UNK&gt; &lt;UNK&gt; &lt;UNK&gt; around the modern &lt;UNK&gt; &lt;UNK&gt; of china edward &lt;UNK&gt; brings to life &lt;UNK&gt; issues that we so easily chose to ignore br br taking no political sides this movie is a &lt;UNK&gt; <b>moving</b> picture of &lt;UNK&gt; that <b>our</b> western &lt;UNK&gt; chooses not to &lt;UNK&gt; us about the by &lt;UNK&gt; of &lt;UNK&gt; &lt;UNK&gt; the &lt;UNK&gt; <b>paid</b> by &lt;UNK&gt; of the lesser developed &lt;UNK&gt; the source of our &lt;UNK&gt; and the &lt;UNK&gt; of our &lt;UNK&gt; &lt;UNK&gt; br br <b>amazing heart</b> breaking impossible to ignore this is a challenging journey but one worth taking please stop staying ignorant and at least see these &lt;UNK&gt; of <b>truth</b> without feeling any &lt;UNK&gt; to take a standing to these <b>issues</b> <b>10 10 definitely</b></p> |
| positive | negative | <p>&lt;START&gt; not a <b>bad</b> film somehow i was made to actually root for the &lt;UNK&gt; to win the game <b>played</b> in the movie even though i don't know anything about soccer and am not a fan the ending on the bus was &lt;UNK&gt; br br <b>the</b> film itself <b>deals</b> with the issue of women in iran and how they are not allowed to go into &lt;UNK&gt; &lt;UNK&gt; amongst men because their &lt;UNK&gt; is <b>inappropriate</b> for women to hear despite this law some women try to sneak in but many of them get caught and &lt;UNK&gt; it's really &lt;UNK&gt; that any society could still <b>have</b> such &lt;UNK&gt; &lt;UNK&gt; of gender in an interview &lt;UNK&gt; says his films are &lt;UNK&gt; of <b>history</b> and its &lt;UNK&gt; and that one day in the <b>future</b> we can watch <b>these</b> movies and see how iran once lived one hopes that <b>future</b> will come &lt;UNK&gt; rather than later</p>                                                                                                |

|          |          |                                                                                                                                                                                                                                                                                                                                                                                                                                                                                                                                                                                                                                                                                                                                                                                                                                                                                                                                                                                                      |
|----------|----------|------------------------------------------------------------------------------------------------------------------------------------------------------------------------------------------------------------------------------------------------------------------------------------------------------------------------------------------------------------------------------------------------------------------------------------------------------------------------------------------------------------------------------------------------------------------------------------------------------------------------------------------------------------------------------------------------------------------------------------------------------------------------------------------------------------------------------------------------------------------------------------------------------------------------------------------------------------------------------------------------------|
| negative | negative | <p>&lt;START&gt; okay look i've seen lots and i do mean lots of these types of films you know the ones where the dvd cover just look so good and &lt;UNK&gt; that you just cant wait to see it well i got got again and i'm &lt;UNK&gt; pretty tired of it but i &lt;UNK&gt; it's pretty simple it sucked i know rather juvenile but it did &lt;UNK&gt; so agree with the other poster that if we had to sit through the boring thing why oh why did the lead actress have to be so &lt;UNK&gt; &lt;UNK&gt; so if i may add and the &lt;UNK&gt; she used convey &lt;UNK&gt; pain &lt;UNK&gt; over the death of her daughter did little help i mean jesus oh but the &lt;UNK&gt; on her back demon &lt;UNK&gt; was pretty neat</p>                                                                                                                                                                                                                                                                    |
| negative | negative | <p>&lt;START&gt; if you're after the real story of early &lt;UNK&gt; &lt;UNK&gt; &lt;UNK&gt; &lt;UNK&gt; you'll be disappointed however if you're after a reasonably crafted &lt;UNK&gt; &lt;UNK&gt; with an art theme you've found you're movie br br this film is such a &lt;UNK&gt; &lt;UNK&gt; depiction of &lt;UNK&gt; &lt;UNK&gt; life that it almost made me &lt;UNK&gt; type in &lt;UNK&gt; &lt;UNK&gt; in &lt;UNK&gt; and check out some of the fact vs fiction &lt;UNK&gt; from a purely technical point of view though the film was alright the sets costumes and especially the &lt;UNK&gt; lighting helped create an &lt;UNK&gt; early &lt;UNK&gt; century experience although the above mentioned &lt;UNK&gt; &lt;UNK&gt; &lt;UNK&gt; let it down a bit br br i wonder how the director co writer &lt;UNK&gt; &lt;UNK&gt; &lt;UNK&gt; her film at the time perhaps she &lt;UNK&gt; to portray &lt;UNK&gt; as a victim which would've been unfortunate because lets face it she was</p> |
| negative | negative | <p>&lt;START&gt; there was a reasonably good looking girl starring the film &lt;UNK&gt; &lt;UNK&gt; but even her looks couldn't stop me from &lt;UNK&gt; it the lowest possible one br br the plot is bad and &lt;UNK&gt; br br what more can i say the movie sucks</p>                                                                                                                                                                                                                                                                                                                                                                                                                                                                                                                                                                                                                                                                                                                              |
| negative | negative | <p>&lt;START&gt; this movie is entertaining enough due to an excellent performance by virginia &lt;UNK&gt; and the fact that &lt;UNK&gt; &lt;UNK&gt; is lovely however the reason the movie is so predictable is that we've seen it all before i've haven't read the book a mother's gift but i hope for &lt;UNK&gt; and &lt;UNK&gt; &lt;UNK&gt; sake it is completely different than this movie unless you consider ending a movie with what is essentially a music video an original idea the entire movie brings to mind the word &lt;UNK&gt;</p>                                                                                                                                                                                                                                                                                                                                                                                                                                                 |
| positive | positive | <p>&lt;START&gt; i am shocked shocked and &lt;UNK&gt; that the &lt;UNK&gt; of you imdb &lt;UNK&gt; who &lt;UNK&gt; before me have not given this film a rating of higher than 7 7 that's a c if i could give &lt;UNK&gt; a 20 i'd &lt;UNK&gt; do it this film ranks high &lt;UNK&gt; the &lt;UNK&gt; of modern comedy alongside half &lt;UNK&gt; and &lt;UNK&gt; as one of the most hilarious films of all time if you know anything about rap music you must see this if you know nothing about rap music learn something and then see this &lt;UNK&gt; to &lt;UNK&gt; &lt;UNK&gt; fail to appreciate the inspired genius of this unique film if you liked bob roberts you'll love this watch it and vote it a 10</p>                                                                                                                                                                                                                                                                               |
| negative | negative | <p>&lt;START&gt; sorry to go against the flow but i thought this film was unrealistic boring and way too long i got tired of watching &lt;UNK&gt; &lt;UNK&gt; long &lt;UNK&gt; battle with herself and the crisis she was &lt;UNK&gt; maybe the film has some cinematic value or represented an important step for the director but for pure entertainment value i wish i would have &lt;UNK&gt; it</p>                                                                                                                                                                                                                                                                                                                                                                                                                                                                                                                                                                                              |

|          |          |                                                                                                                                                                                                                                                                                                                                                                                                                                                                                                                                                                                                                                                                  |
|----------|----------|------------------------------------------------------------------------------------------------------------------------------------------------------------------------------------------------------------------------------------------------------------------------------------------------------------------------------------------------------------------------------------------------------------------------------------------------------------------------------------------------------------------------------------------------------------------------------------------------------------------------------------------------------------------|
| negative | negative | <START> there's one line that makes <b>it worth to</b> rent for angel fans everyone else this is just a very <b>bad</b> horror flick the female characters are typical horror movies <UNK> they are <b>wooden annoying</b> and dumb you are <b>glad</b> when they are killed <b>off</b> long <b>live</b> the <b>strong</b> female character in a horror movie                                                                                                                                                                                                                                                                                                    |
| negative | positive | <START> this was a <b>really funny</b> movie <b>br</b> br every <b>1</b> in the movie was <b>trying</b> to be serious that is what made this movie <b>so funny</b> i mean come on a <UNK> head on a human body can it get any funnier good job sci fi <b>keep</b> the <b>comedy</b> movies coming i never thought movies could get anymore retarded if they keep it up they will have to <UNK> the sci <UNK> channel the comedy sci fi channel or something like that br br i cant wait <b>4</b> the next blockbuster movie from sci fi br br ill be ready with a <UNK> of popcorn and a case of beer or a bottle of <UNK> and ill be ready to laugh it up again |
| positive | negative | <START> <b>fair</b> drama <b>love</b> story movie that <b>focuses</b> on the lives of blue <UNK> people finding new life thru new <b>love</b> the acting here is good but the film <b>fails in</b> cinematography screenplay directing and <b>editing</b> the <b>story script</b> is <b>only</b> average at best this film will be enjoyed by fonda and de niro fans and by people who love middle age love stories where in the <UNK> is on a more <UNK> and <UNK> level it would also be interesting for people who are interested on the subject matter regarding <UNK>                                                                                       |
| negative | positive | <START> i <b>saw</b> this movie <b>with</b> my rock <UNK> <UNK> and we found the entire thing so <b>ridiculous as</b> to be beyond pity for one if <UNK> is out free <UNK> by himself there's no need to carry any <UNK> but i guess those <UNK> <UNK> look <UNK> mountain <UNK> so <b>let's</b> throw them in for those <UNK> folks who think that <UNK> looks <b>anything</b> like the <UNK> in italy <b>where</b> the movie was filmed <b>well</b> the hollywood <UNK> have got a lot more <b>ridiculous foul</b> <UNK> stuff for you to <UNK>                                                                                                                |
| negative | negative | <START> please even if you are in the <b>worst</b> of the <UNK> <UNK> from watching this <b>flick</b> br br i <b>don't</b> think whether anything was right with this <b>movie</b> at all on a <UNK> <UNK> i watched this and i literally <UNK> <UNK> and <UNK> <UNK> of my life down the closet <b>poor</b> acting <b>stupid</b> direction <b>weak</b> storyline and <b>pathetic</b> action sequences and when you <b>blend</b> this together you get double impact even least of the expectations were not met br br i <b>guess</b> i did learn one thing never watch van <UNK> action flicks they are pure <UNK> of time                                      |
| negative | negative | <START> very <b>bad</b> acting and a very <b>shallow</b> story <b>not</b> even a decent b movie br br events that were <UNK> to be shocking like humans <UNK> on board an alien ship were boring and very <b>lame</b> br br this is one of the <b>worst</b> sci fi i've ever seen i saw the 5 0 stars and decided to watch it since i like the genre but it sucked so <b>bad</b> br br now there's really <b>very few</b> good movies on alien subject i think because most of them are <b>low</b> budget br br i give it <b>3</b> 10                                                                                                                            |
| negative | negative | <START> <UNK> <b>folks</b> br br forget about that movie john c should be <b>ashamed</b> that he appears as executive producer in the credits <UNK> <UNK> has never been and will never be an actor and the fx are a <b>joke</b> br br the first vampires was <b>good</b> and it was the <b>only</b> vampires this thing here just <b>wears</b> the same <b>name</b> br br just <b>a waste</b> of time <b>thinks</b> br br jake <UNK>                                                                                                                                                                                                                            |

|          |          |                                                                                                                                                                                                                                                                                                                                                                                                                                                                                                                                                                                                          |
|----------|----------|----------------------------------------------------------------------------------------------------------------------------------------------------------------------------------------------------------------------------------------------------------------------------------------------------------------------------------------------------------------------------------------------------------------------------------------------------------------------------------------------------------------------------------------------------------------------------------------------------------|
| negative | negative | <START> i'm easily entertained i enjoyed hot shots and the naked gun and their many sequels even when most people found them unbearable i've even managed to enjoy most <UNK> <UNK> movies there is only one movie that i've seen that i can honestly say was bad and this was it it's been a while since i've seen it but i do remember sitting in the theater thinking this is a dumb movie why did i see this it's honestly the only movie that i cannot recommend                                                                                                                                    |
| positive | positive | <START> ray <UNK> and tom <UNK> shine in this <UNK> example of <UNK> love and <UNK> <UNK> plays <UNK> <UNK> a mildly mentally <UNK> young man who is putting his 12 minutes younger twin brother <UNK> who plays <UNK> through medical school it is set in <UNK> and deals with the issues of <UNK> <UNK> the <UNK> bond of <UNK> child abuse and good always winning out over evil it is captivating and filled with laughter and tears if you have not yet seen this film please rent it i promise you'll be amazed at how such a wonderful film could go un noticed                                   |
| positive | positive | <START> brilliant movie the <UNK> were just amazing too bad it ended before it <UNK> <UNK> waited <UNK> years for a sequel but <UNK>                                                                                                                                                                                                                                                                                                                                                                                                                                                                     |
| positive | positive | <START> excellent film <UNK> <UNK> will hold your interest throughout has not been shown on american tv for a decade one scene that has always stayed with me is the german <UNK> gas attack you will find others hope they soon put it on tape                                                                                                                                                                                                                                                                                                                                                          |
| positive | positive | <START> i was <UNK> by this touching and hilarious film not to mention surprised i was also surprised to find that the voice of paulie was performed by jay <UNK> the performance was so <UNK> <UNK> neither <UNK> into <UNK> nor becoming too hard under the new <UNK> <UNK> that i thought that this must be some <UNK> old pro not the baby faced mr <UNK> a very impressive performance indeed and it's <UNK> to see his talents being taken seriously in a string of quirky indie films                                                                                                             |
| positive | positive | <START> heart <UNK> erotic drama are the words that come to mind when i think of secret games it becomes more erotic as the film goes along and at one point blew me away i didn't expect the delightful scene i was about to encounter the call girl has her first <UNK> and what a <UNK> one of the most erotic lesbian scenes i have ever seen the husband should have <UNK> to his wife and perhaps she wouldn't have gone on this erotic journey it turned out to cost them in the end but it was one exciting ride go see this movie                                                               |
| negative | negative | <START> i saw this movie when it was released and my <UNK> for it has stuck with me all these years br br here's why br br <UNK> goal seems to be to take every <UNK> image in the <UNK> and make it <UNK> if a character were to say my heart takes flight <UNK> be shown an actual human heart with <UNK> <UNK> attached <UNK> across the screen br br this process makes for some <UNK> <UNK> but ultimately it's a <UNK> exercise and it becomes deadly boring br br i don't <UNK> the pleasure other viewers found in this movie but it's worth knowing that not everyone in the audience was <UNK> |

|          |          |                                                                                                                                                                                                                                                                                                                                                                                                                                                                                                        |
|----------|----------|--------------------------------------------------------------------------------------------------------------------------------------------------------------------------------------------------------------------------------------------------------------------------------------------------------------------------------------------------------------------------------------------------------------------------------------------------------------------------------------------------------|
| positive | positive | <START> good sequel to murder in a small town in this one cash and his police <UNK> buddy <UNK> a <UNK> plot involving a nazi criminal a <UNK> witch and a family of <UNK> ups and their <UNK> <UNK> as in the original the viewer is treated to a nice little mystery with <UNK> <UNK> and sounds of pre war america go see it                                                                                                                                                                        |
| positive | positive | <START> it's a lovely movie it deeply <UNK> the chinese underground <UNK> current lives if you chinese culture <UNK> rock n roll music there you go i will highly recommend this one but one thing i am wondering is whether this movie has been showed in <UNK> i <UNK> doubt it d                                                                                                                                                                                                                    |
| negative | negative | <START> the only reason to see this movie is for a brilliant performance by <UNK> <UNK> <UNK> who is <UNK> in the movie within the movie as usual tom <UNK> is good too otherwise it's c p the <UNK> doesn't even exist how does he <UNK> change the letters on the theatre <UNK> to spell out the <UNK> lame                                                                                                                                                                                          |
| negative | positive | <START> bette davis brings her full <UNK> of <UNK> to this miserable flop which is another <UNK> on the hilariously <UNK> lovers theme sadly cagney and davis are truly <UNK> in acting styles and the mix is not simply <UNK> but <UNK> the only <UNK> in the film comes from <UNK> <UNK> who literally <UNK> in his usual part as the <UNK> <UNK> dad jack <UNK> performance can only be described as an act of <UNK> on the audience                                                                |
| negative | negative | <START> this movie is so awful it is hard to find the right words to describe it br br at first the story is so ridiculous a <UNK> minded human can write a better plot the actors are boring and <UNK> perhaps they were compelled to play in this cheesy film br br the camera <UNK> of the national forest are the only good in this whole movie i should feel <UNK> because i paid for this lousy picture br br hopefully nobody makes a sequel or make a similar film with such a worse storyline |
| positive | positive | <START> in ten words or less to describe this film barbara stanwyck is too appealing and it is great the film is wonderful except for the perhaps <UNK> on ending but i love happy endings anyway barbara stanwyck however as the <UNK> blonde gold <UNK> is amazing she knows what she wants and goes after it this film is sexy and excellent                                                                                                                                                        |
| positive | positive | <START> in <UNK> this was my all time favorite movie betty <UNK> costumes were so <UNK> that i wanted to grow up to be her and dress like that douglas <UNK> jr was <UNK> as the <UNK> <UNK> officer silly and <UNK> as this movie might appear at first when i was eight years old it seemed to me to say something important about relations between men and women i saw it again the other day i was surprised to find that it still did                                                            |
| negative | negative | <START> this film proves that the commercial cinema or else the hollywood movies are in a serious crisis there is absolutely no reason that this movie should have been produced apart from the fact that somebody expected success based on <UNK> name there is no worth <UNK> to the plot it is a bit more <UNK> than a <UNK> what else the screen is somewhat <UNK> <UNK> is a bad actor but francis <UNK> is even worse br br rating 1 10                                                          |



|          |          |                                                                                                                                                                                                                                                                                                                                                                                                                                                                                                                                                                                                                               |
|----------|----------|-------------------------------------------------------------------------------------------------------------------------------------------------------------------------------------------------------------------------------------------------------------------------------------------------------------------------------------------------------------------------------------------------------------------------------------------------------------------------------------------------------------------------------------------------------------------------------------------------------------------------------|
| positive | positive | <START> this movie is fun to watch <UNK> have much of a plot well there isn't a plot but there are good jokes and situations that you will laugh at the basic storyline is <UNK> is trying to have a nice date while <UNK> is <UNK> with <UNK> cousin they smoke <UNK> go in a music store a <UNK> <UNK> a comedy club and even go into <UNK> house they don't even know rated r                                                                                                                                                                                                                                              |
| positive | positive | <START> maria <UNK> is an extraordinary woman presented fully and very <UNK> despite being so <UNK> as to border on <UNK> she will do everything to make her marriage work including <UNK> <UNK> and sexual <UNK> and thus beneath the <UNK> <UNK> she reveals a rather sweet value system the film suffers from an <UNK> and unexpected ending which afterwards feels <UNK> <UNK> with the <UNK> familiar from ending your school creative writing exercise with <UNK> then i <UNK> <UNK> it is also book ended at the other end with the most eccentric title sequence i've ever seen but don't let any of that put you off |
| negative | negative | <START> this film is really bad with a script full of <UNK> lines and incredibly bad performances the special effects are also bad not the worst ones i have seen either and the music is so bad that you have to listen to it to believe it just two short themes 30 seconds long or so are repeated constantly throughout the whole film br br all in all one of the worst films i have ever seen                                                                                                                                                                                                                           |
| positive | positive | <START> <UNK> the devil knows you're <UNK> is one of the best movies i've seen in a br br long time the acting from br br the excellent ensemble cast is incredible philip <UNK> hoffman putting in an outstanding performance and is <UNK> every time he's on screen ethan <UNK> matches him scene for scene and albert <UNK> simply <UNK> up the screen <UNK> <UNK> is however br br <UNK> <UNK> but looks amazing for her <UNK> years the script is excellent the story line non <UNK> but easy enough to follow sidney lumet although not known for his <UNK> has turned out a gem with this one                          |
| negative | positive | <START> this movie is chilling <UNK> of bollywood being just a <UNK> of hollywood bollywood also tends to feed on past <UNK> for <UNK> its industry br br <UNK> <UNK> <UNK> made this movie with the <UNK> that a <UNK> mix of <UNK> and on the <UNK> will bring home an oscar it turned out to be <UNK> mistake br br even the idea of the title is inspired from the <UNK> <UNK> classic in the original brando is shown as raising <UNK> as symbolism of peace br br bollywood must move out of hollywood's shadow if it needs to be taken seriously                                                                       |
| positive | positive | <START> hello this movie is well okay just kidding its awesome it's not a block <UNK> <UNK> hit it's not meant to be but its a big hit in my world and my sisters we are <UNK> <UNK> go <UNK> this is a great movie for me                                                                                                                                                                                                                                                                                                                                                                                                    |
| negative | negative | <START> some might <UNK> but there is actually a real art with making particularly bad films this misses out on all <UNK> br br a bunch of young people women with <UNK> breasts and <UNK> wet t <UNK> naturally go to film blood surfing and end up running into a <UNK> foot crocodile br br not only was the <UNK> obviously fake but some of the props notice the boat hitting the <UNK> in particular look like they've come out of <UNK> br br no good from start to finish don't see it                                                                                                                                |

|          |          |                                                                                                                                                                                                                                                                                                                                                                                                                                                                                                                                                                                                                                                                    |
|----------|----------|--------------------------------------------------------------------------------------------------------------------------------------------------------------------------------------------------------------------------------------------------------------------------------------------------------------------------------------------------------------------------------------------------------------------------------------------------------------------------------------------------------------------------------------------------------------------------------------------------------------------------------------------------------------------|
| positive | positive | <START> since <UNK> <UNK> julie <UNK> <b>has</b> been one of my role models and her <b>performance</b> in this as a woman who helps the man she loves get in <UNK> with his <UNK> side is <b>magnificent</b> i would never have believed her character in the hands of a lesser actress but <UNK> <b>pulls it off</b> with <UNK> and <UNK> <UNK> <UNK> gives <b>his best performance</b> to date in the male <b>lead</b>                                                                                                                                                                                                                                           |
| negative | positive | <START> first one was <b>much better</b> i had <b>enjoyed</b> it a lot this one <b>has not</b> even produced a smile the <b>idea was</b> showing <b>how deep</b> down can human kind fall but in reference to the characters <b>not</b> the film maker                                                                                                                                                                                                                                                                                                                                                                                                             |
| negative | negative | <START> i must <b>say</b> when i read the storyline on the back of the case it <b>sounded</b> really interesting but <b>when</b> i started to watch the movie <b>seemed boring</b> at first and even more at the end <b>some</b> scenes are <b>way too</b> long and the story <b>has not</b> been worked out properly                                                                                                                                                                                                                                                                                                                                              |
| positive | positive | <START> i can't remember many films where a bumbling idiot of a hero was <b>so funny</b> throughout <b>leslie</b> <UNK> is such the <UNK> of a hero that he's too <UNK> to be <UNK> by a <b>gorgeous vampire</b> i had the good luck to see it on a <b>big</b> screen and to find a video to watch again and <b>again</b> <b>9 10</b>                                                                                                                                                                                                                                                                                                                              |
| negative | negative | <START> this flick reminds me some really <b>bad</b> science fiction movies from 50's and 60's it is not scary or interesting but it's dull cheesy and <b>stupid</b> special effects are <b>laughable</b> all actors are <b>ludicrous</b> and the ending is simply <b>awful don't waste</b> your <b>money</b> rent or buy something better i give it <b>3</b> 5 out of 10 i found this <b>turkey</b> quite amusing because of its stupidity                                                                                                                                                                                                                        |
| negative | negative | <START> this movie was <UNK> as a comedy and a mystery it <b>fails badly</b> at both the <b>only</b> mystery here is <b>why would anybody</b> make such a <b>poorly</b> constructed movie the <b>only</b> comedy is the laugh i got when i saw how high the <UNK> here <UNK> it could there be two movies with the same name the movie i saw starred a girl with pretty blue eyes and a plot <b>that wasn't</b> there br br                                                                                                                                                                                                                                        |
| negative | negative | <START> i <b>love</b> the comics although i do have problems fully <b>understanding</b> the <b>stories</b> Æ the <b>visual</b> style is <b>unique</b> with all its <UNK> dust and <UNK> so i thought i knew what i was up for surprisingly i understood the main plot Æ but some extremely <b>poorly</b> decisions where made for its visual style br br i mean really <b>bad</b> looking cg human actors in close ups <UNK> it did <b>not</b> work at all <UNK> and the other <UNK> <UNK> was successfully made in cg and very <b>close</b> to the comic version br br i think with real actors this movie could <b>have</b> been a cult movie br br what a shame |
| positive | positive | <START> this is one <b>amazing</b> movie you <b>have</b> to realize that chinese <UNK> is <b>complicated</b> and philosophical there are always <b>stories</b> behind <b>stories</b> i myself did not understand everything but knowing chinese <UNK> i <UNK> them in school it is very <b>complicated</b> you just <b>have</b> to take what it gives you <b>enjoy</b> the movie <b>and</b> <b>enjoy</b> the ride <UNK>                                                                                                                                                                                                                                            |

|          |          |                                                                                                                                                                                                                                                                                                                                                                                                                                                                                                                                                                                                                    |
|----------|----------|--------------------------------------------------------------------------------------------------------------------------------------------------------------------------------------------------------------------------------------------------------------------------------------------------------------------------------------------------------------------------------------------------------------------------------------------------------------------------------------------------------------------------------------------------------------------------------------------------------------------|
| negative | negative | <START> i <b>don't</b> know why this <UNK> was ever <UNK> in the movie <b>business</b> this movie short is gross to say the least it is a <b>bunch</b> of 5 7 year old children wearing <UNK> with big bobby <UNK> <b>acting like</b> adults and too much so <b>however</b> it is <b>interesting</b> <b>because</b> it is a <b>good</b> example of how the good old days may not have been so good after all thank god we have laws against this kind of material now br br this is one <b>short</b> from the shirley temple festival                                                                              |
| positive | positive | <START> the <UNK> murder case starts off at a run and doesn't stop until the very <b>end</b> everybody had reason to kill the victim and several people tried william powell is <b>terrific</b> as <UNK> <UNK> <UNK> detective mary <UNK> is <b>refreshing</b> <b>as</b> the put upon <UNK> who only wants to marry her scottish <UNK> and enjoy her <UNK> this movie comes <UNK> with <b>nancy</b> drew reporter on <b>dvd</b> which is also <b>fun</b> if you <b>have</b> to rent the disc or check it <b>out</b> from your local library do it it's pure <b>entertainment</b>                                   |
| negative | negative | <START> another <b>trashy</b> <b>grade z</b> <UNK> from the <UNK> albert <UNK> tim <UNK> 13 <UNK> clint eastwood like cop from outer space chases an ugly <b>flying</b> head to earth and gets involved in a gang war in south <UNK> <UNK> short but <UNK> <b>dull</b> with the <UNK> effects since attack of the <UNK> woman they should <b>have</b> fired the continuity guy too note how <UNK> <UNK> <UNK> and <UNK> in every second shot <UNK> bad but <UNK> <b>why</b> we watch <b>these</b> movies <UNK> it sequel <UNK> vs <UNK> <UNK> is <UNK> even <b>worse</b> if <UNK> possible br br <b>0</b> of br br |
| negative | negative | <START> what a <b>dreadful</b> film this is the only reason you would <b>want</b> to sit through this <b>mess</b> is the <UNK> sight of miss <UNK> the <b>painful</b> overacting of mr <UNK> which became <b>embarrassing</b> at times <b>ruined</b> what <b>might have</b> been a reasonable film if the correct actors had <b>been</b> cast mr <UNK> is <b>no</b> tom cruise the actor he obviously wants to be                                                                                                                                                                                                  |
| positive | positive | <START> such a long <b>journey</b> is a <b>well</b> <b>crafted</b> film a <b>good</b> shoot and a <b>showcase</b> for some good performances however the story is such a <UNK> of subplots and <UNK> characters that it becomes a <b>sort</b> of jack of all <b>plots</b> and master of <b>none</b> also western audiences will likely find the <UNK> of the rather obscure <UNK> culture a little much to get their arms around in 1 <b>7</b> <b>hours</b> recommended for those with an interest in india                                                                                                        |
| negative | negative | <START> very <b>badly</b> made film the action <b>violence</b> scenes are <b>ridiculous</b> <b>br</b> br <b>1</b> point for the presence of burton and <UNK> <b>1</b> point for the real <b>tragic</b> event of the massacre of the <b>innocent</b> <UNK> <b>2</b> 10                                                                                                                                                                                                                                                                                                                                              |

Table 2: Key words picked by L2X for ten randomly selected samples. The true labels and the labels from the model are also shown in the first two columns.
